# Supplementary material for: Clustering Analysis Identified Three Long COVID Phenotypes and Their Association with General Health Status and Working Ability
Source: MDPI journal article supplement (doi:10.3390/jcm12113617), 2023-05-23
Supplement: s1 [file s1]

Supplementary Figure S1: Chart flow and steps of data analysis.

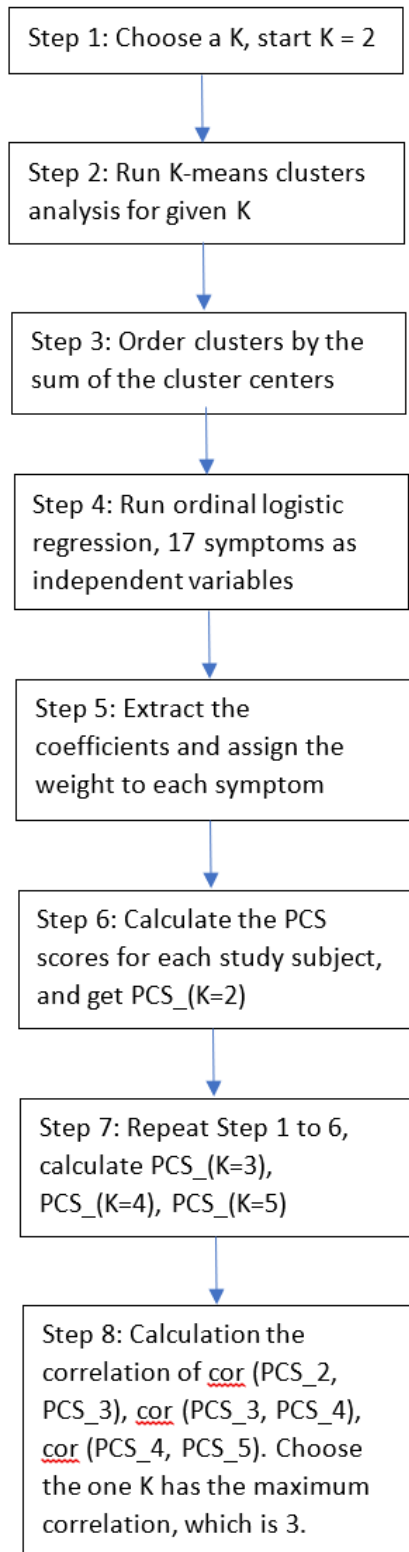

Supplementary Figure S2: The boxplot of the PCS scores for three K-Means clusters (n = 506). The boxes show the median, and 25% and 75% quantiles. The whiskers show the most extreme data points or 1.5 times of the interquartile range (IQR) from the box. Cluster I (n = 299) has the minimum sum of the cluster center, Cluster III (n = 87) has the maximum sum of the cluster center, the sum of the cluster center of Cluster II (n = 120) is in the middle.

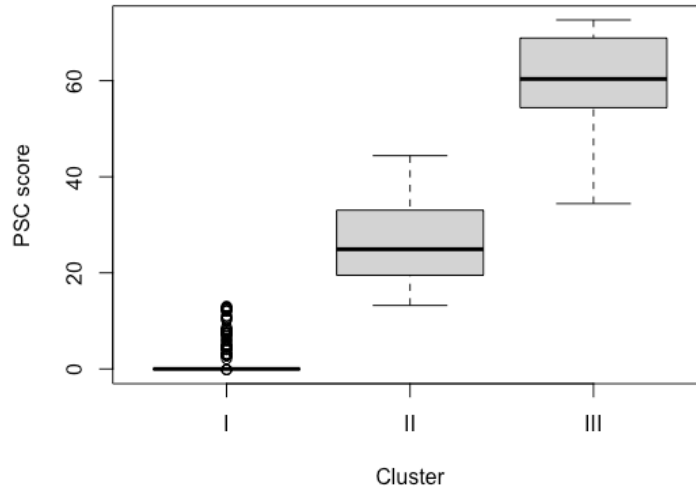

Supplementary Figure S3: The distribution of the post-COVID syndrome (PCS) score in the 3 cohorts (non-hospitalized, hospitalized, post-COVID).

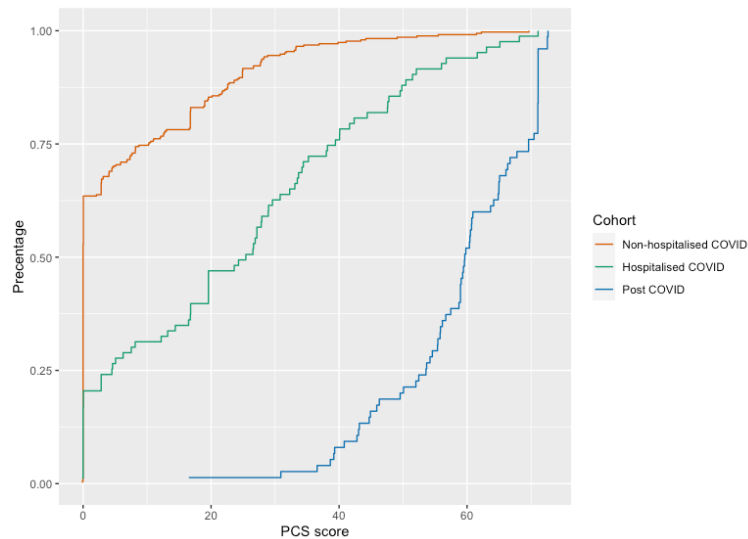

Supplementary Figure S4: Principal component analysis were performed on the 17 symptom complex indicators that form the PCS score definition in all the three cohorts together ( $n = 506$ ). The first two principal components, which account for 55.4% (horizontal axis) and 6.2% (vertical axis) of the variance of the indicators, are displayed. Individuals are colored according to their respective cluster affiliations (I, II, III). The K-Means centers for each cluster are also shown. Cluster I ( $n = 299$ ) has the minimum sum of the cluster center, Cluster III ( $n = 87$ ) has the maximum sum of the cluster center, the sum of the cluster center of Cluster II ( $n = 120$ ) is in the middle.

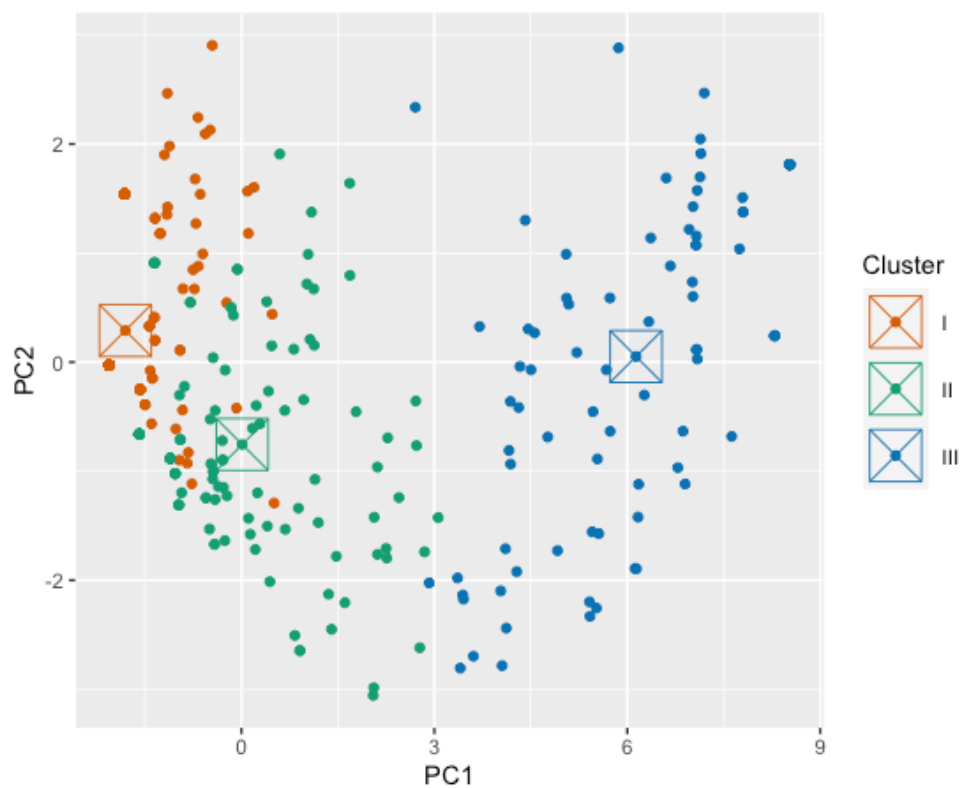

Supplementary Table S1: The proportion of the missing values for each variable for all three cohorts combined (n = 584).

| Variable                          | % missing values (n) |
|-----------------------------------|----------------------|
| GI Symptom                        | 11.47 (67)           |
| Skin problems                     | 11.30 (66)           |
| Sore throat                       | 11.30 (66)           |
| Cough                             | 10.96 (64)           |
| Nasal Symptom                     | 10.62 (62)           |
| Chest pain                        | 10.62 (62)           |
| Heart palpitation                 | 10.62 (62)           |
| Vertigo                           | 10.45 (61)           |
| Anxiety mood                      | 10.45 (61)           |
| Muscle and joints pain            | 10.27 (60)           |
| Dyspnea                           | 9.93 (59)            |
| Depressive mood                   | 9.93 (59)            |
| Impaired taste and smell          | 9.76 (57)            |
| Headache                          | 9.42 (55)            |
| Memory and concentration problems | 9.42 (55)            |
| Sleep problems                    | 9.25 (54)            |
| Fatigue                           | 8.39 (49)            |

Supplementary Table S2: The Pearson correlation between Post COVID Scores (PCS) for different numbers of clusters based on regression on all three sub-cohorts (n = 506).

| <b>Pearson correlation</b> | <b>All three sub-cohorts together</b> |
|----------------------------|---------------------------------------|
| 2 and 3 clusters           | 0.980                                 |
| 3 and 4 clusters           | 0.992                                 |
| 4 and 5 clusters           | 0.989                                 |

Supplementary Figure S5: Principal component analysis were performed on the 17 symptom complex indicators that form the PCS score definition in the train data set ( $n = 407$ ). The first two principal components, which account for 55.4% (horizontal axis) and 6.4% (vertical axis) of the variance of the indicators, are displayed. Individuals were colored according to their respective cluster affiliations (I, II, III). The K-Means centers for each cluster are also shown. Cluster I ( $n = 234$ ) has the minimum sum of the cluster center, Cluster III ( $n = 69$ ) has the maximum sum of the cluster center, the sum of the cluster center of Cluster II ( $n = 104$ ) is in the middle.

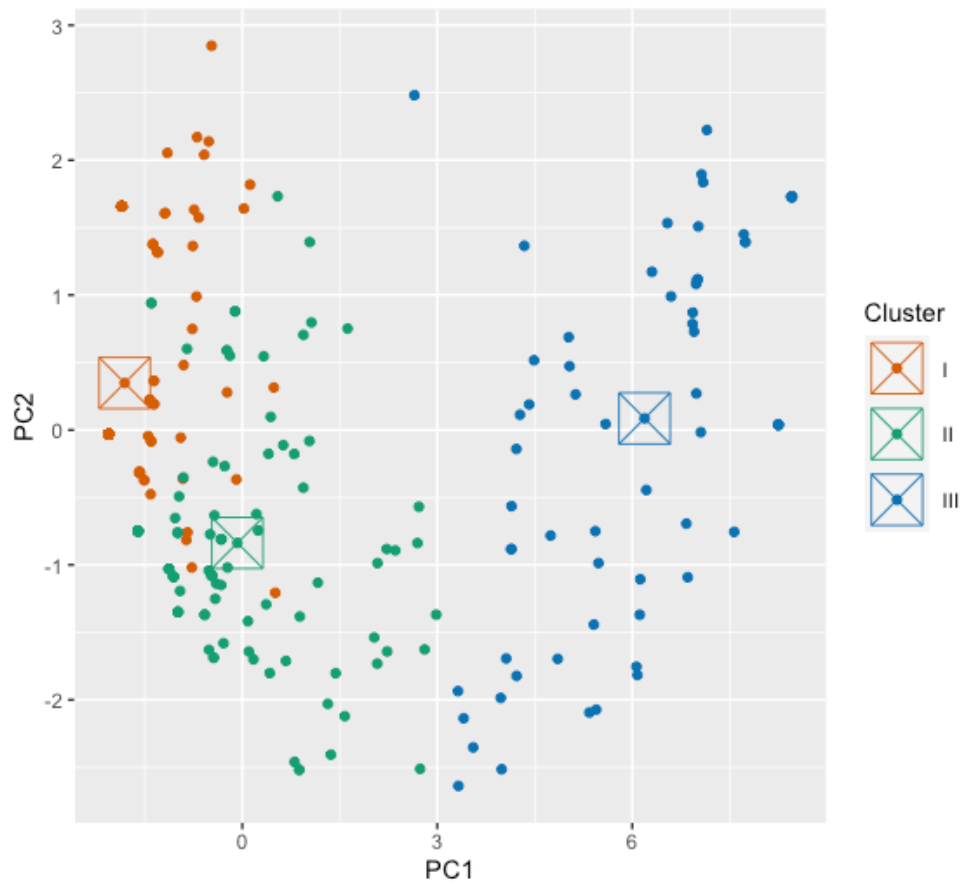

Supplementary Figure S6: The boxplot of the PCS scores for three K-Means clusters in the train data set ( $n = 407$ ). The boxes show the median, and 25% and 75% quantiles. The whiskers show the most extreme data points or 1.5 times of the interquartile rang (IQR) from the box.

Cluster I ( $n = 234$ ) has the minimum sum of the cluster center, Cluster III ( $n = 69$ ) has the maximum sum of the cluster center, the sum of the cluster center of Cluster II ( $n = 104$ ) is in the middle.

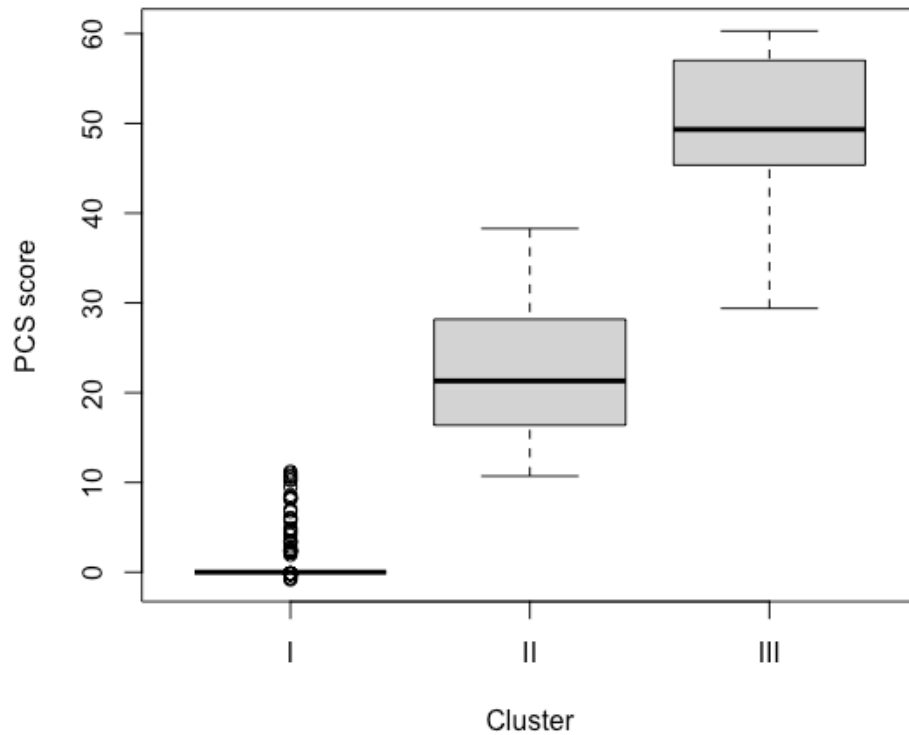

Supplementary Figure S7: The frequency of long-term remaining symptoms in three cohorts in the train set (n = 407). Non/mild (PCS  $\leq 12$ , n = 235), Moderate (PCS > 12 and PCS  $\leq 40$ , n = 106) and Severe (PCS > 40, n = 66).

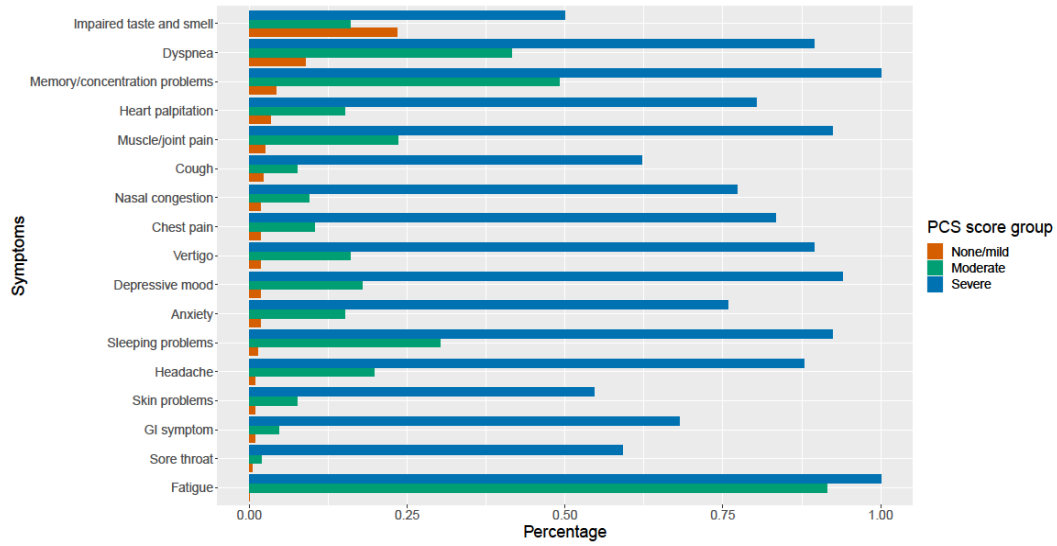



Supplementary Table S3: The Pearson correlation between Post COVID Scores (PCS) for different numbers of clusters based on regression on train-data (used PCS score weight from train data on both train and test data).

| <b>Pearson correlation</b> | <b>Train-data (n = 407)</b> | <b>Test-data (n = 99)</b> |
|----------------------------|-----------------------------|---------------------------|
| 2 and 3 clusters           | 0.947                       | 0.955                     |
| 3 and 4 clusters           | 0.985                       | 0.988                     |
| 4 and 5 clusters           | 0.986                       | 0.986                     |

Supplementary Table S4. Post COVID score (PSC) development by doing K-Means clustering with 3 clusters and ordinal logistic regression, on train-data (n = 407). Cluster I (n = 234) has the minimum sum of the cluster center, Cluster III (n = 69) has the maximum sum of the cluster center, the sum of the cluster center of Cluster II (n = 104) is in the middle.

| No | Symptom complex                   | Train cluster center I<br>(n = 234) | Train cluster center II<br>(n = 104) | Train cluster center III<br>(n = 69) | Regression coefficient | PCS* score weight |
|----|-----------------------------------|-------------------------------------|--------------------------------------|--------------------------------------|------------------------|-------------------|
| 2  | Fatigue                           | 0.000                               | 0.913                                | 0.986                                | 14.465                 | 14.5              |
| 15 | Memory and concentration problems | 0.0395                              | 0.481                                | 1.000                                | 8.337                  | 8.3               |
| 4  | Sore throat                       | 0.004                               | 0.019                                | 0.565                                | 4.827                  | 4.8               |
| 3  | Muscles and joints pain           | 0.026                               | 0.221                                | 0.913                                | 4.556                  | 4.6               |
| 1  | Cough                             | 0.021                               | 0.067                                | 0.609                                | 3.678                  | 3.7               |
| 6  | Headache                          | 0.009                               | 0.183                                | 0.870                                | 3.635                  | 3.6               |
| 7  | Vertigo                           | 0.017                               | 0.144                                | 0.884                                | 3.489                  | 3.5               |
| 10 | Chest pain                        | 0.017                               | 0.087                                | 0.826                                | 3.314                  | 3.3               |
| 12 | GI symptoms                       | 0.009                               | 0.009                                | 0.667                                | 3.034                  | 3.0               |
| 11 | Heart palpitation                 | 0.034                               | 0.135                                | 0.797                                | 2.541                  | 2.5               |
| 5  | Dyspnea                           | 0.085                               | 0.413                                | 0.884                                | 2.372                  | 2.4               |
| 14 | Depressive mood                   | 0.017                               | 0.173                                | 0.913                                | 2.222                  | 2.2               |
| 13 | Anxiety mood                      | 0.017                               | 0.135                                | 0.754                                | 1.919                  | 1.9               |
| 17 | Sleep problems                    | 0.013                               | 0.288                                | 0.913                                | 1.914                  | 1.9               |
| 16 | Impaired taste and smell          | 0.235                               | 0.154                                | 0.493                                | -0.157                 | -0.2              |
| 9  | Nasal symptoms                    | 0.017                               | 0.087                                | 0.754                                | -0.664                 | -0.7              |
| 8  | Skin problems                     | 0.009                               | 0.067                                | 0.536                                | -2.462                 | -2.5              |

\*Post COVID syndrome (PCS) score.

Supplementary Table S5: The characteristic of the test clusters based on PCS score in test-data.  
(n = 99)

| Characteristics                           | None/mild<br>PCS* score<br>≤ 12<br>(n = 64) | Moderate<br>PCS* score ><br>12 and ≤ 40<br>(n = 20) | Severe<br>PCS*<br>score > 40<br>(n = 15) | P values, <sup>+</sup> | P values<br>adjusted, <sup>+</sup> |
|-------------------------------------------|---------------------------------------------|-----------------------------------------------------|------------------------------------------|------------------------|------------------------------------|
| Sociodemographic and lifestyle            |                                             |                                                     |                                          |                        |                                    |
| Age (mean, sd)                            | 43.9 (13.5)                                 | 51.9 (11.2)                                         | 51.2 (12.7)                              | <b>0.023</b>           | <b>0.041</b>                       |
| Female (n, %)                             | 45 (70.3)                                   | 13 (65.0)                                           | 11 (73.3)                                | 0.855                  | 0.855                              |
| Country of birth (Sweden or not) (n, %)   | 52 (81.2)                                   | 14 (70.0)                                           | 14 (93.3)                                | 0.220                  | 0.296                              |
| Education level (n, %)                    |                                             |                                                     |                                          | 0.733                  | 0.824                              |
| Up to Gymnasium                           | 23 (35.9)                                   | 7 (35.0)                                            | 7 (46.7)                                 |                        |                                    |
| Two years                                 | 5 (7.8)                                     | 3 (15.0)                                            | 2 (13.3)                                 |                        |                                    |
| Three years                               | 36 (56.3)                                   | 10 (50.0)                                           | 6 (40.0)                                 |                        |                                    |
| Working status (n, %)                     |                                             |                                                     |                                          | <b>0.001</b>           | <b>0.002</b>                       |
| Working                                   | 58 (92.0)                                   | 18 (94.7)                                           | 8 (53.4)                                 |                        |                                    |
| Parental leave                            | 1 (1.6)                                     | 0 (0.0)                                             | 0 (0)                                    |                        |                                    |
| Looking for a job                         | 1 (1.6)                                     | 1 (5.3)                                             | 0 (0)                                    |                        |                                    |
| Retired                                   | 2 (3.2)                                     | 0 (0.0)                                             | 2 (13.3)                                 |                        |                                    |
| Sick leave                                | 1 (1.6)                                     | 0 (0.0)                                             | 5 (33.3)                                 |                        |                                    |
| Student                                   | 0 (0)                                       | 0 (0.0)                                             | 0 (0)                                    |                        |                                    |
| Marital status (n, %)                     |                                             |                                                     |                                          | 0.230                  | 0.296                              |
| Married                                   | 21 (32.8)                                   | 10 (50.0)                                           | 5 (33.3)                                 |                        |                                    |
| Sambo                                     | 26 (40.6)                                   | 3 (15.0)                                            | 7 (46.7)                                 |                        |                                    |
| Divorced                                  | 10 (15.7)                                   | 4 (20.0)                                            | 0 (0.0)                                  |                        |                                    |
| Widower                                   | 3 (4.7)                                     | 1 (5.0)                                             | 0 (0.0)                                  |                        |                                    |
| Single                                    | 4 (6.2)                                     | 2 (10.0)                                            | 3 (20.0)                                 |                        |                                    |
| Smoking (n, %)                            |                                             |                                                     |                                          | <b>&lt; 0.001</b>      | <b>&lt;0.001</b>                   |
| Never Smoked                              | 51 (81.0)                                   | 12 (63.2)                                           | 0 (0)                                    |                        |                                    |
| Ex-smoker                                 | 10 (15.9)                                   | 3 (15.8)                                            | 7 (46.7)                                 |                        |                                    |
| Current smoker                            | 2 (3.1)                                     | 4 (21.0)                                            | 8 (53.3)                                 |                        |                                    |
| Snus (n,%)                                | 50 (79.4)                                   | 8 (44.4)                                            | 3 (20.0)                                 | <b>&lt; 0.001</b>      | <b>&lt;0.001</b>                   |
| Pre-existing comorbidities (n, %) and BMI |                                             |                                                     |                                          |                        |                                    |
| BMI (mean, sd)                            | 25.2 (4.2)                                  | 27.0 (4.4)                                          | 30.2 (6.8)                               | <b>0.002</b>           | <b>0.004</b>                       |
| Hypertension                              | 8 (12.5)                                    | 3 (15.0)                                            | 4 (26.7)                                 | 0.387                  | 0.532                              |
| Heart disease                             | 2 (3.1)                                     | 2 (10.0)                                            | 1 (6.7)                                  | 0.450                  | 0.550                              |
| Hypo/hyperthyroidism                      | 5 (7.8)                                     | 2 (10.0)                                            | 1 (6.7)                                  | 0.930                  | 0.930                              |
| Diabetes                                  | 0 (0)                                       | 3 (15.0)                                            | 0 (0)                                    | <b>0.002</b>           | <b>0.005</b>                       |
| Lung disease                              | 6 (9.4)                                     | 6 (30.0)                                            | 9 (60.0)                                 | <b>&lt;0.001</b>       | <b>&lt;0.001</b>                   |
| Liver disease                             | 0 (0)                                       | 0 (0)                                               | 0 (0)                                    | NA                     | NA                                 |
| Cancer                                    | 2 (3.1)                                     | 1 (5.0)                                             | 2 (13.3)                                 | 0.267                  | 0.420                              |

|                                                               |             |                 |                |                   |                   |
|---------------------------------------------------------------|-------------|-----------------|----------------|-------------------|-------------------|
| Immunosuppressive treatment                                   | 3 (4.7)     | 2 (10.0)        | 1 (25.0)       | 0.682             | 0.750             |
| Depression/Anxiety                                            | 16 (25.0)   | 8 (40.0)        | 9 (60.0)       | <b>0.027</b>      | 0.050             |
| Chronic pain                                                  | 3 (4.7)     | 2 (10.0)        | 6 (40.0)       | <b>&lt;0.001</b>  | <b>0.002</b>      |
| <hr/>                                                         |             |                 |                |                   |                   |
| Other measurements                                            |             |                 |                |                   |                   |
| Symptom severity at onset, median (IQR)                       | 2 (2, 3)    | 4 (3, 4)        | 4 (3.5, 4.5)   | <b>&lt;0.001</b>  | <b>&lt;0.001</b>  |
| Hospitalised, n (%)                                           | 6 (9.4)     | 10 (50.0)       | 6 (40.0)       | <b>0.001</b>      | <b>0.002</b>      |
| COVID infection laboratory confirmed, n (%)                   | 64 (100)    | 19 (95)         | 12 (80)        | <b>0.003</b>      | <b>0.004</b>      |
| Number of months from infection onset, mean (SD)              | 12.0 (0)    | 13.1 (3.6)      | 20.4 (6.5)     | <b>&lt;0.001</b>  | <b>&lt;0.001</b>  |
| Mean number of remaining symptoms, mean (SD)                  | 0.5 (0.9)   | 5.2 (2.9)       | 13.3 (2.2)     | <b>&lt; 0.001</b> | <b>&lt;0.001</b>  |
| Health before COVID, median (IQR)                             | 90 (85, 95) | 95 (91.3, 98.8) | 95 (70, 95)    | 0.579             | 0.579             |
| Health today, median (IQR)                                    | 85 (80, 95) | 70 (54, 80)     | 45 (20, 60)    | <b>&lt;0.001</b>  | <b>&lt;0.001</b>  |
| Difference health now and before COVID, median (IQR)          | 0 (10, 0)   | -20 (-30, -11)  | -25 (-33, -13) | <b>0.023</b>      | <b>0.029</b>      |
| Workability before COVID, median (IQR)                        | 10 (9, 10)  | 10 (9, 10)      | 10 (8.5, 10)   | 0.240             | 0.264             |
| Workability now, median (IQR)                                 | 9 (8, 10)   | 7 (6, 8)        | 4 (1, 6)       | <b>&lt; 0.001</b> | <b>&lt; 0.001</b> |
| Difference working ability now and before COVID, median (IQR) | 0 (0, 0)    | -2 (-3, -2)     | -6 (-8, -3)    | <b>&lt; 0.001</b> | <b>&lt; 0.001</b> |

\*Post COVID syndrome (PCS) score; +, P values shown in bold are significant under level 0.05.
